# Supplementary material
Source: PubMed Central journal article supplement (PMC3375331)
Supplement: NIHMS339425-supplement-01.pdf [file NIHMS339425-supplement-01.pdf]

## Appendix

Supplementary Figure 1. Dose-response relations between  $\log_e$  (resistin) (A and B) and  $\log_e$  (adiponectin) (C) and AF are illustrated with generalized additive Cox models (adjusted for AF risk score [A] and for AF risk score + CRP [B and C]) using splines. Dashed lines represent 95% confidence limits of the resulting HRs.

Supplementary Figure 1

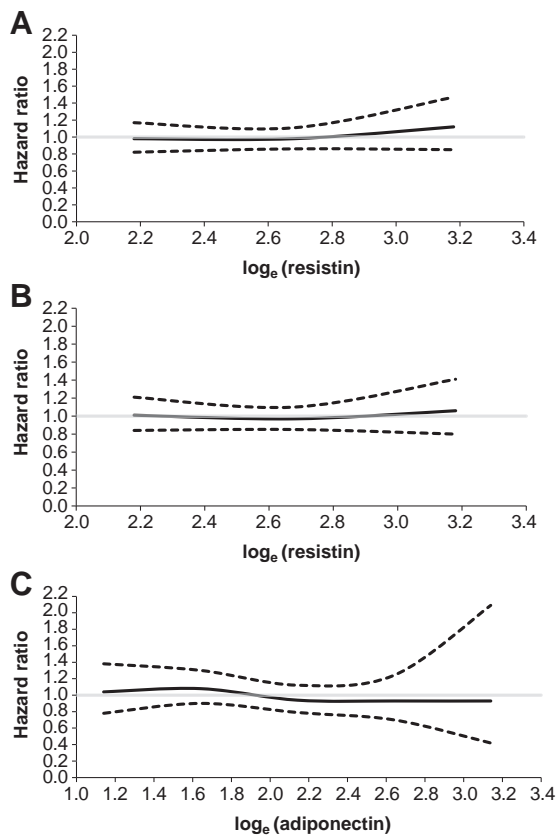

Resistin, Adiponectin and AF risk.
